# Supplementary material for: PCA22 acts as a suppressor of atrzf1 to mediate proline accumulation in response to abiotic stress in Arabidopsis
Source: PubMed Central journal article supplement (PMC5444443; doi:10.1093/jxb/erx069), 2017-03-21
Supplement: erx069_suppl_Supplementary_Figures_S1_S8_Table_S1.pdf [file erx069_suppl_Supplementary_Figures_S1_S8_Table_S1.pdf]

Figure S1

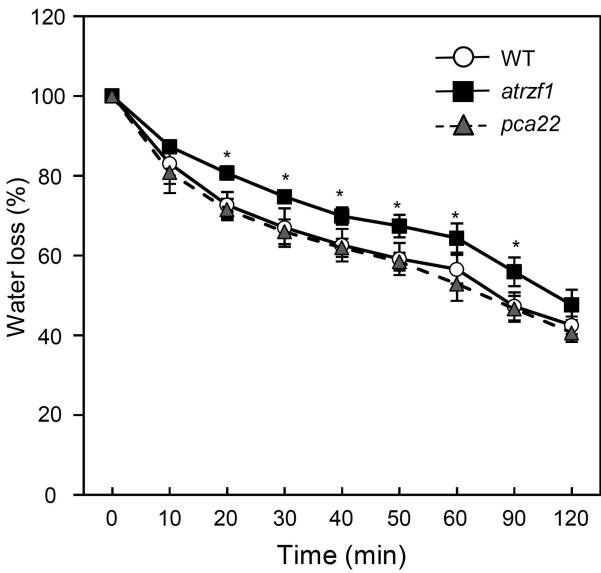

Figure S2

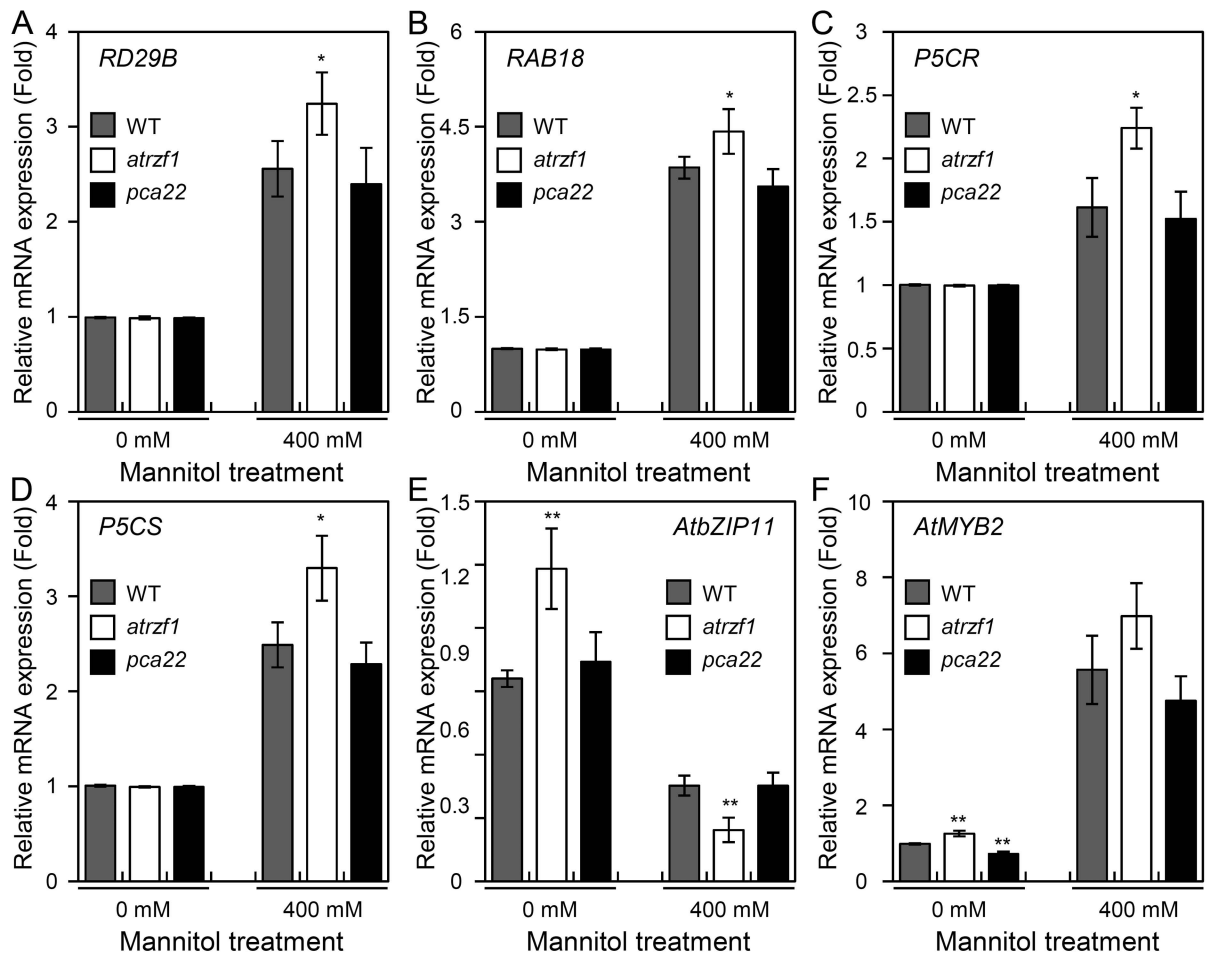

Figure S3

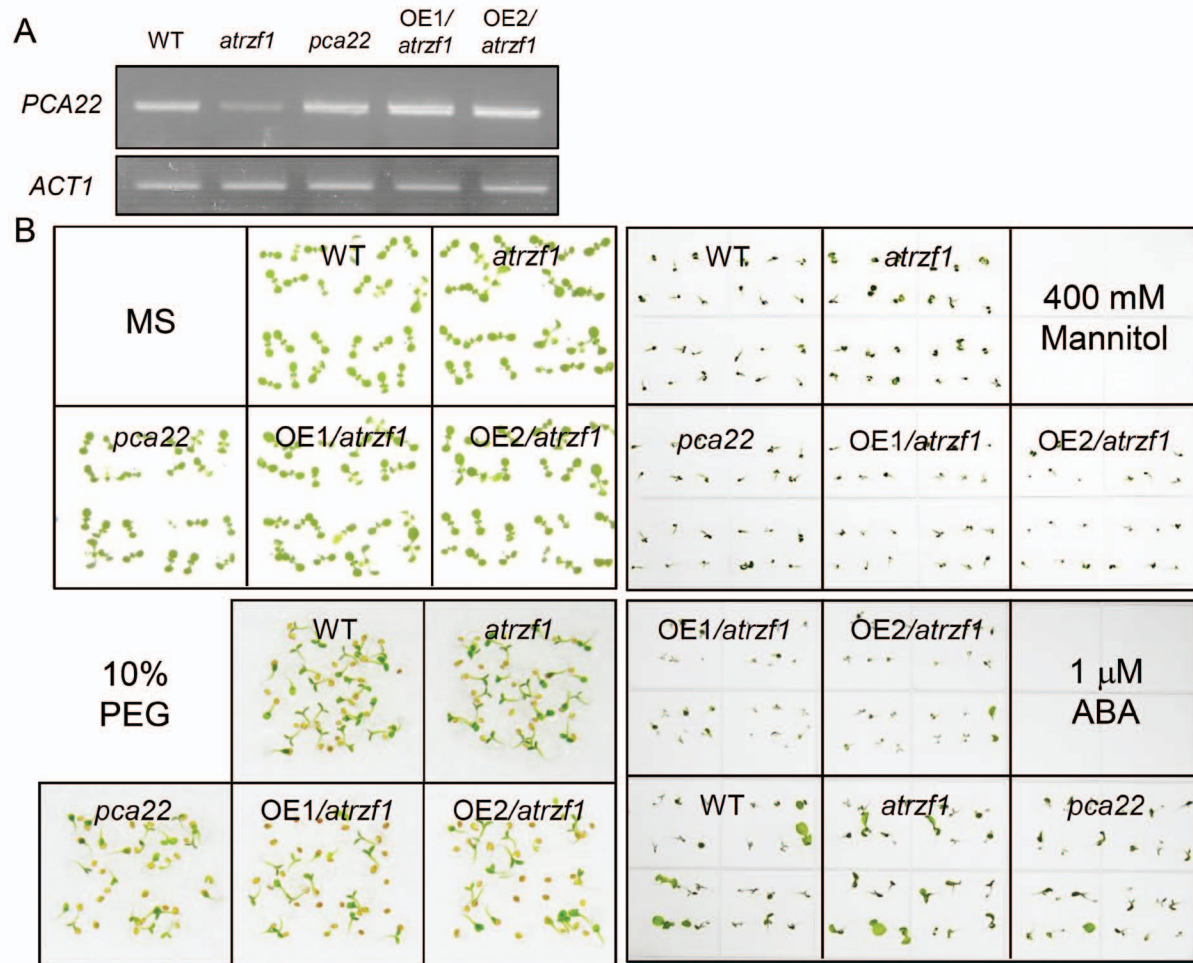

Figure S4

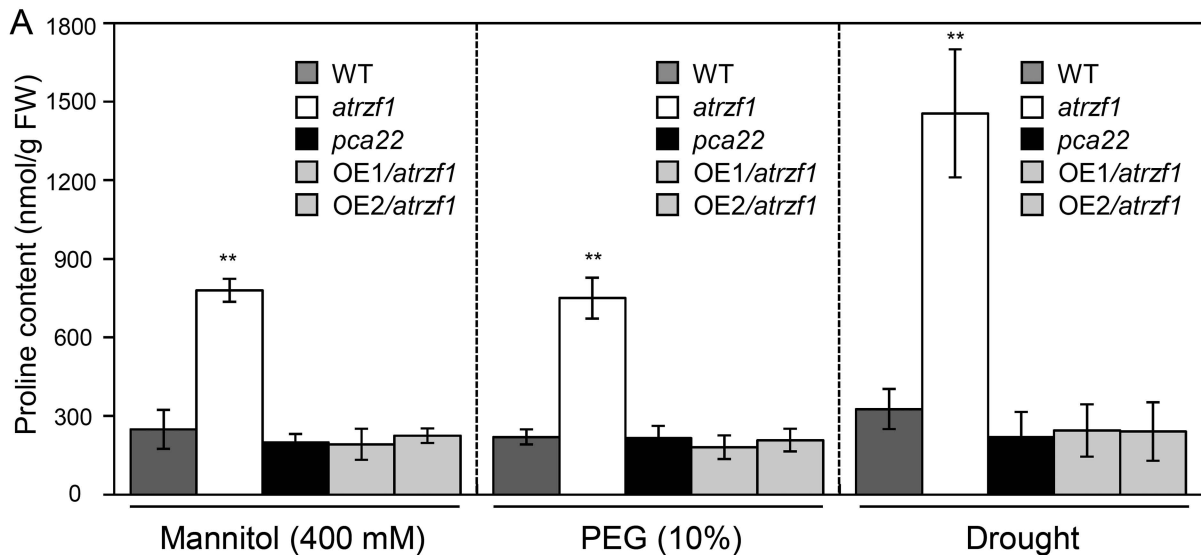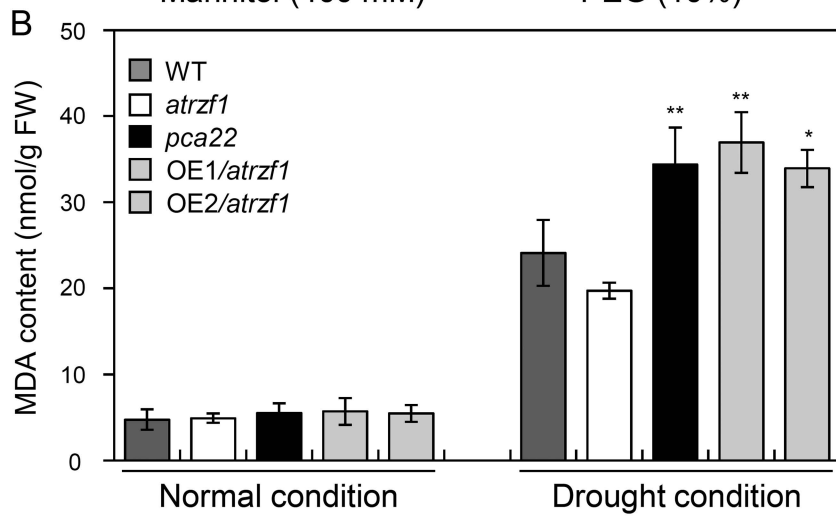

# Figure S5

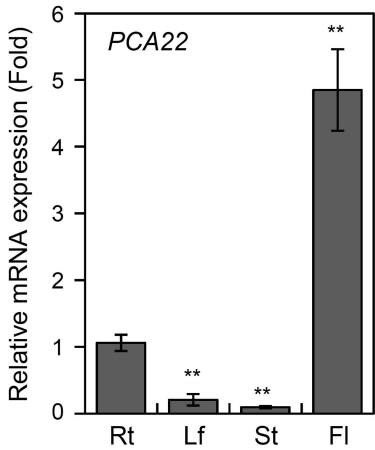

Figure S6

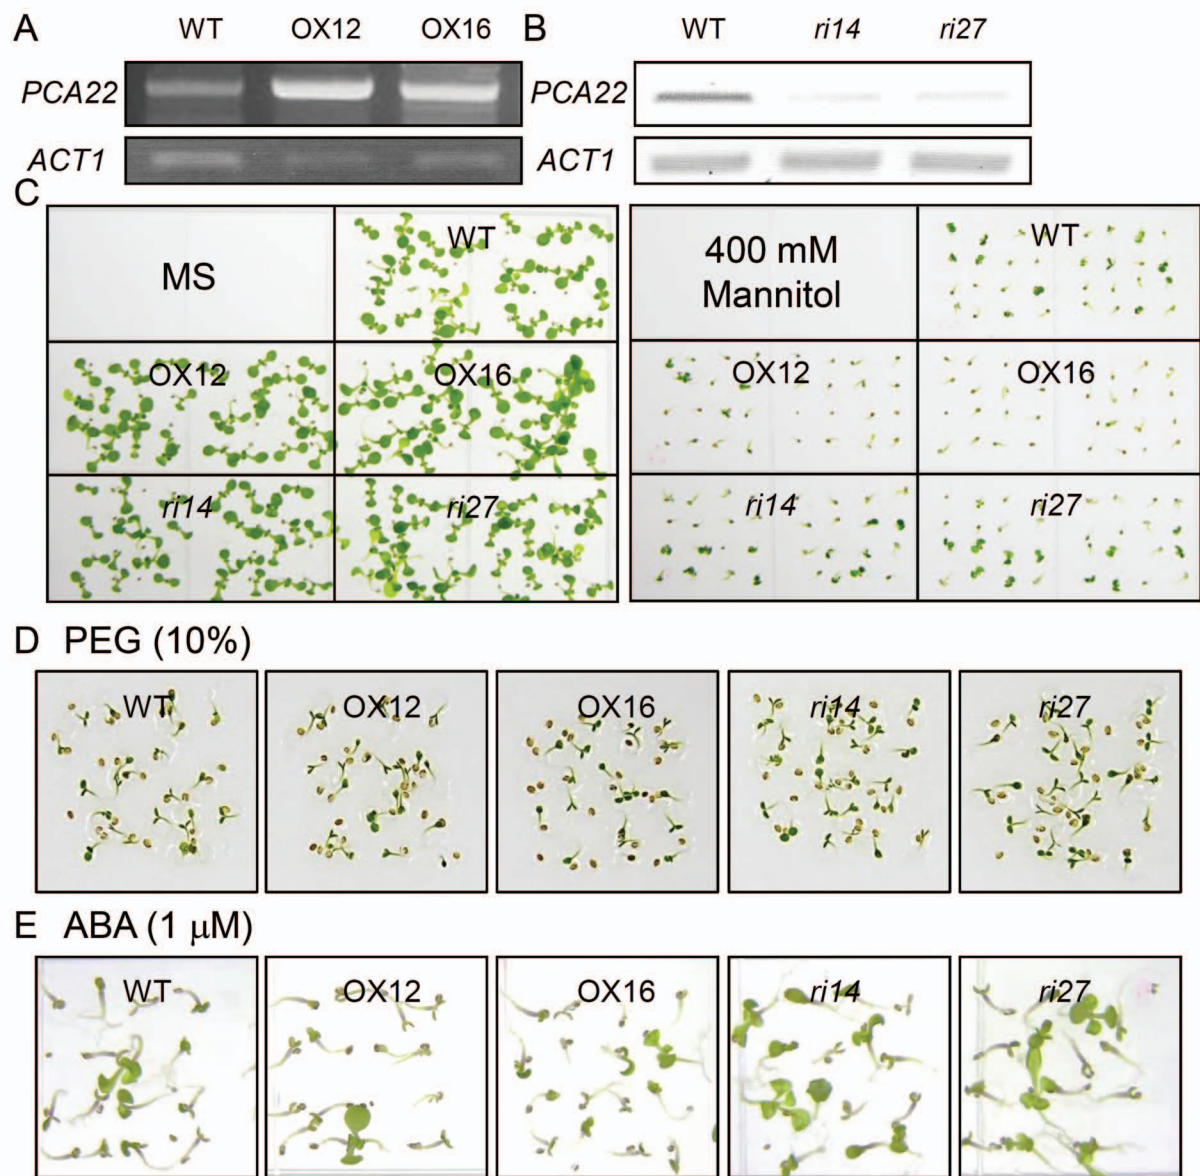

Figure S7

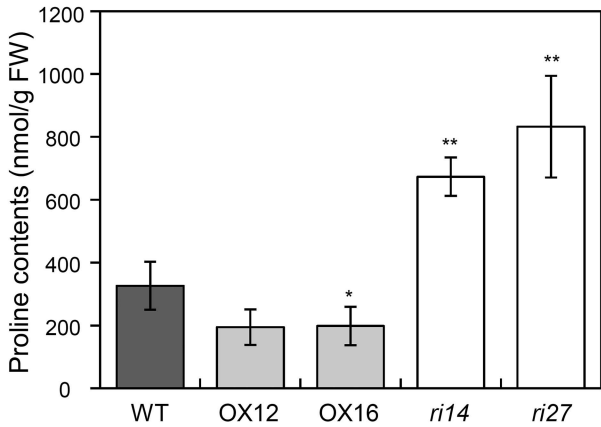

Figure S8

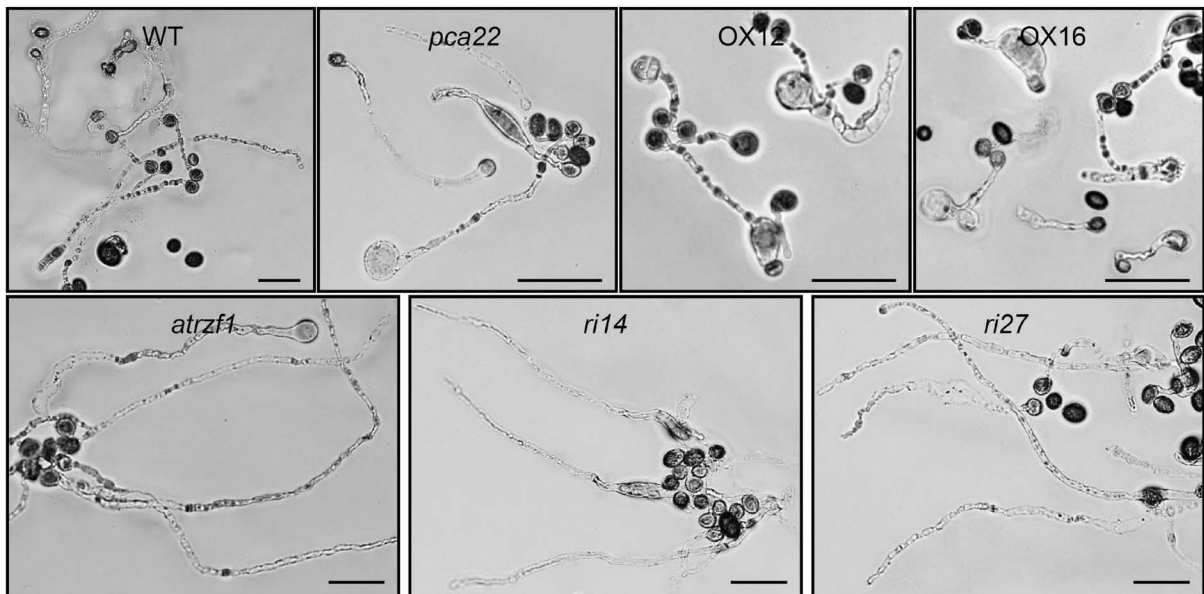



Table S1. Gene-specific primers used for TAIL-PCR, qPCR and RT-PCR assays

| <b>Primer</b>               | <b>Primer sequence (5' to 3') used for TAIL-PCR</b>                        |
|-----------------------------|----------------------------------------------------------------------------|
| LB1                         | ATACGACGGATCGTAATTTGTC                                                     |
| LB2                         | TAATAACGCTGCGGACATCTAC                                                     |
| LB3                         | TTGACCATCATACTCATTGCTG                                                     |
| AD2                         | NGTCGASWGANAWGAA                                                           |
| <b>Gene</b>                 | <b>Primer sequence (5' to 3') used for qPCR</b>                            |
| <i>PCA22</i> (At2g28625)    | Forward: CTGTGAGCTACGGAGTTGACTG<br>Reverse: CTAACAAAGGCAACCACAACATC        |
| <i>P5CR</i> (At5g14800)     | Forward: GATGGAGATTCTTCCGATTCC<br>Reverse: CCAGCTGCAACAGAAACCAGA           |
| <i>P5CS1</i> (At2g39800)    | Forward: CGACGGAGACAATGGAATTGT<br>Reverse: GATCAGAAATGTGTAGGTAGC           |
| <i>RAB18</i> (At5g66400)    | Forward: CGATCCAGCAGCAGTATGAC<br>Reverse: TTCGAAGCTTAACGGCCACC             |
| <i>RD29A</i> (At5g52310)    | Forward: GACGGGATTTGACGGAGA<br>Reverse: CCGCCACATAATCTCTACCC               |
| <i>RD29B</i> (At5g52300)    | Forward: CGTCCTTATGGTCATGAGC<br>Reverse: GCCTCATGTCCGTAAGAGG               |
| <i>AtMYB2</i> (At2g47190)   | Forward: ATGGAAGATTACGAGCGAAT<br>Reverse: CCACTAATCTCGGCATCCA              |
| <i>AtbZIP11</i> (At4g34590) | Forward: ATGGAATCGTCGTCGTCG<br>Reverse: CATCACACTCCAAACCAAC                |
| <i>At2g28620</i>            | Forward: ACCGTTTAATTCAGAGGAGA<br>Reverse: GTTCTTCATTGTAGAGCTCA             |
| <i>KCS12</i> (At2g28630)    | Forward: GTGGTCGGAAAACCTCCCGA<br>Reverse: GACTTTCGGGTGGGCAATCA             |
| <i>AtRZF1</i> (At3g56580)   | Forward: GAATTCATGTCAAGTATTCGGAATAC<br>Reverse: GTCGACATAGTCAAAAGGCCATCCAC |
| <i>ACT1</i> (At1g32200)     | Forward: CATCAGGAAGGACTTGTACGG<br>Reverse: GATGGACCTGACTCGTCATAC           |
| <b>Primer</b>               | <b>Primer sequence (5' to 3') used for T-DNA insertion site</b>            |
| F1                          | ATACGACGGATCGTAATTTGTC                                                     |
| R1                          | GTGTGATGTGAACCAAGATTG                                                      |
